# Supplementary material for: Direct white light emission from inorganic–organic hybrid semiconductor bulk materials
Source: Royal Society of Chemistry journal article supplement (doi:10.1039/c0jm02213f), 2010-01-01
Supplement: c0jm02213f.pdf [file c0jm02213f.pdf]

Supplementary Material (ESI) for Journal of Materials Chemistry

This journal is (c) The Royal Society of Chemistry 2010

## **Direct white light emission from inorganic-organic hybrid semiconductor bulk materials**

**Wooseok Ki <sup>a†</sup>, Jing Li <sup>a\*</sup>, Goki Eda <sup>b‡</sup>, and Manish Chhuwalla <sup>b</sup>**

<sup>a</sup> *Department of Chemistry and Chemical Biology, Rutgers University, 610 Taylor Road, Piscataway, NJ 08854, USA. Fax: 732-445-5312; Tel: 732-445-3758; E-mail: Jingli@rutgers.edu*

<sup>b</sup> *Department of Materials Science and Engineering, Rutgers University, 607 Taylor Road, Piscataway, NJ 08854, USA*

<sup>†</sup> *Current address: School of Chemical Engineering, Purdue University, 480 Stadium Mall Dr., West Lafayette, IN 47907, USA*

<sup>‡</sup> *Current address: Department of Materials, Imperial College London Exhibition Rd., London SW7 2AZ, UK*

**Supplementary Information**

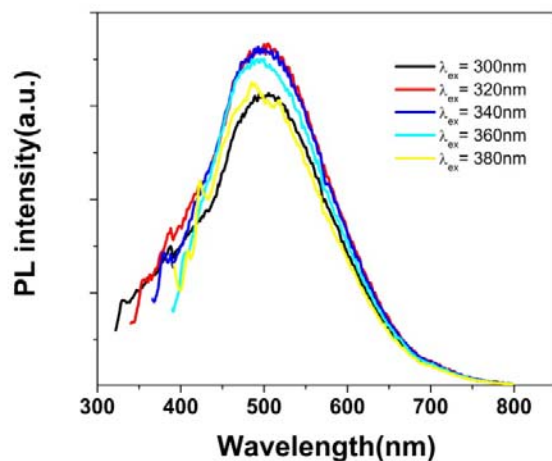

**Fig. S1.** Photoluminescence emission spectra taken at various excitation wavelength. The emission characteristics remain the same over the entire excitation wavelength range between 320 and 380 nm.

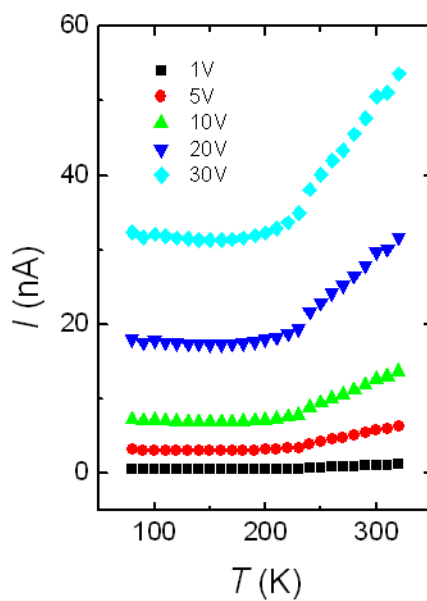

**Fig. S2.** I-V characteristics of a thin pellet of  $[\text{Cd}_2\text{Se}_2(\text{ba})]:25\text{mol}\%$  Te as a function of temperature.
